# Supplementary material for: Detection and Molecular Characterization of Enteric Viruses in Poultry Flocks in Hebei Province, China
Source: MDPI journal article supplement (doi:10.3390/ani12202873), 2022-10-21
Supplement: s1 [file s1]

## Article

# Detection and Molecular Characterization of Enteric Viruses in Poultry Flocks in Hebei Province, China

Libao Chen <sup>1</sup>, Ligong Chen <sup>1</sup>, Xuejing Wang <sup>2,\*</sup>, Shuying Huo <sup>1</sup> and Yurong Li <sup>1,\*</sup>

<sup>1</sup> College of Veterinary Medicine, Hebei Agricultural University, Veterinary Biological Technology Innovation Center of Hebei Province, Baoding 071001, China

<sup>2</sup> Institute of Animal Husbandry and Veterinary Medicine of Hebei Province, Baoding 071000, China

\* Correspondence: wangxuejing771226@163.com (X.W.); liyurong0312@126.com (Y.L.); Tel.: +86-13730474185 (X.W.); +86-15930207103 (Y.L.)

**Supplementary Table S1:** The Information of 212 samples (including 145 positive and 67 negative samples).

| No.                                           | Place/Year           | age     | Code Name | ChPV | ANV | CAstV | FAdV-I | ARoV | IBV | ARe | Viruses | Clinical signs |
|-----------------------------------------------|----------------------|---------|-----------|------|-----|-------|--------|------|-----|-----|---------|----------------|
| <b>The information of broiler (2019-2020)</b> |                      |         |           |      |     |       |        |      |     |     |         |                |
| b1                                            | Baoding/ 2019/BC     | 05w34d  | C3        | +    |     |       | +      |      |     |     | 2       | DP             |
| b2                                            | Baoding/ 2020/BC     | 04w28d  | CLB129    | +    | +   |       |        |      |     |     | 2       | St             |
| b3                                            | Baoding /2020/BC     | 04w25d  | CLB88     | +    |     |       |        |      |     |     | 1       | DP             |
| b4                                            | Baoding/2020/BC      | 04w28d  | CLB123    | +    |     |       |        |      |     |     | 1       | RP             |
| b5                                            | Baoding /2019/BC     | 05w30d  | CLB37     | +    |     |       |        |      |     |     | 1       | DP             |
| b6                                            | Baoding/2019/BC      | 03w15d  | CLB82     | +    | +   |       |        |      |     |     | 2       | NR             |
| b7                                            | Baoding/2019/BC      | 04w27d  | CLB29     | +    |     |       |        |      |     |     | 1       | St             |
| b8                                            | Baoding /2020/BC     | 05w33d  | CLB6      |      | +   | +     |        |      |     |     | 2       | NR             |
| b9                                            | Baoding/2019/BC      | 03w15d  | CLB36     | +    | +   |       |        |      |     |     | 2       | St             |
| b10                                           | Baoding/2019/BC      | 05w35d  | C7        | +    |     | +     |        |      |     |     | 2       | DP RP          |
| b11                                           | Baoding/2020/BC      | 05w35d  | CLB64     | +    |     |       |        |      |     |     | 1       | DP             |
| b12                                           | Baoding/2020/BC      | 03w15d  | CLB77     | +    | +   |       |        |      |     |     | 2       | DP             |
| b13                                           | Baoding/2020/BC      | 05w34d  | CLB70     | +    |     |       |        |      |     |     | 1       | DP             |
| b14                                           | Baoding/2019/BC      | 04w26d  | CLB32     | +    | +   |       |        |      |     |     | 2       | St RP          |
| b15                                           | Hengshui/2019/BC     | 04w28d  | CLB96     | +    |     | +     |        |      |     |     | 2       | St             |
| b16                                           | Hengshui/2020/BC     | 04w27d  | CLB120    | +    | +   |       |        |      |     |     | 2       | St             |
| b17                                           | Shijiazhuang/2020/BC | 04w27d  | CLB111    |      | +   |       |        |      |     |     | 1       | RP             |
| b18                                           | Shijiazhuang/2019/BC | 04w24d  | CLB51     | +    | +   |       |        |      |     |     | 2       | St DP          |
| b19                                           | Shijiazhuang/2019/BC | 05w32d  | CLB15     | +    |     |       |        |      |     |     | 1       | DP             |
| b20                                           | Zhangjiakou/2019/BC  | 05w32d  | CLB18     |      |     | +     |        |      |     |     | 1       | DP             |
| b21                                           | Zhangjiakou/2019/BC  | 05w34d  | CLB17     | +    | +   | +     |        |      |     |     | 3       | DP             |
| b22                                           | Baoding/2020/BC      | 06w 35d | CLB83     |      |     |       |        |      |     |     | 0       |                |
| b23                                           | Baoding/2020/BC      | 04w27d  | CLB94     |      |     |       |        |      |     |     | 0       |                |
| b24                                           | Baoding/2020/BC      | 05w31d  | CLB99     |      |     |       |        |      |     |     | 0       |                |
| b25                                           | Hengshui/2020/BC     | 05w26d  | CLB103    |      |     |       |        |      |     |     | 0       |                |
| b26                                           | Baoding/2020/BC      | 05w37d  | CLB119    |      |     |       |        |      |     |     | 0       |                |

|                                                         |                   |         |          |   |  |   |   |   |   |   |       |
|---------------------------------------------------------|-------------------|---------|----------|---|--|---|---|---|---|---|-------|
| b27                                                     | Baoding/2020/BC   | 04w28d  | CLB123-1 |   |  |   |   |   |   | 0 |       |
| <b>The information of Pullet/layer hens (2019-2020)</b> |                   |         |          |   |  |   |   |   |   |   |       |
| C1                                                      | Baoding/2019/hen  | 05w30d  | CLB62    | + |  |   |   |   |   | 1 | St    |
| C2                                                      | Baoding/ 2020/hen | 19w130d | CLB122   | + |  |   |   |   |   | 1 | DP    |
| C3                                                      | Baoding/ 2020/hen | 19w130d | CLB114   | + |  |   |   |   |   | 1 | DP    |
| C4                                                      | Baoding/2020/hen  | 02w11d  | CLB86    |   |  | + | + |   |   | 2 | DP    |
| C5                                                      | Baoding/2020/hen  | 07w45d  | CLB24    | + |  | + |   |   |   | 2 | DP    |
| C6                                                      | Baoding/2020/hen  | 19w130d | CLB118   | + |  |   |   |   |   | 1 | DP    |
| C7                                                      | Baoding/2020/hen  | 13w90d  | CLB121   | + |  |   |   |   |   | 1 | DP St |
| C8                                                      | Baoding/2020/hen  | 07w45d  | CLB25    | + |  |   |   |   |   | 1 | DP    |
| C9                                                      | Baoding/2020/hen  | 19w130d | CLB126   | + |  | + |   |   | + | 3 | DP    |
| C10                                                     | Baoding/2019/hen  | 26w180d | C6       | + |  |   |   |   |   | 1 | NR    |
| C11                                                     | Baoding/2019/hen  | 07w45d  | CLB33    | + |  | + |   |   |   | 2 | DP    |
| C12                                                     | Baoding/2019/hen  | 19w130d | CLB13    |   |  |   |   |   | + | 1 | DP    |
| C13                                                     | Baoding/2020/hen  | 08w70d  | CLB22    | + |  | + |   |   |   | 2 | DP    |
| C14                                                     | Baoding/2020/hen  | 05w35d  | CLB59    | + |  |   |   |   |   | 1 | St    |
| C15                                                     | Baoding/2019/hen  | 06w38d  | CLB91    | + |  |   |   |   |   | 1 | RP    |
| C16                                                     | Baoding/2020/hen  | 10w64d  | CLB78    | + |  |   |   |   |   | 1 | DP RP |
| C17                                                     | Baoding/2019/hen  | 19w130d | CLB27    | + |  | + |   | + |   | 3 | St    |
| C18                                                     | Baoding/2020/hen  | 04w22d  | CLB100   | + |  |   |   |   |   | 1 | DP RP |
| C19                                                     | Baoding/2020/hen  | 10w67d  | CLB134   | + |  | + |   | + | + | 4 | St    |
| C20                                                     | Baoding/2020/hen  | 10w67d  | CLB52    | + |  |   |   | + |   | 2 | DP    |
| C21                                                     | Baoding/2019/hen  | 08w54d  | CLB90    |   |  |   |   |   | + | 1 | DP    |
| C22                                                     | Baoding/2020/hen  | 19w130d | CLB56    | + |  |   |   |   | + | 2 | NR    |
| C23                                                     | Baoding/2020/hen  | 19w130d | CLB11    |   |  | + |   |   |   | 1 | DP    |
| C24                                                     | Baoding/2020/hen  | 18w120d | CLB131   | + |  |   |   |   |   | 1 | DP    |
| C25                                                     | Baoding/2020/hen  | 10w70d  | CLB98    | + |  |   |   |   | + | 2 | RP    |
| C26                                                     | Baoding/2019/hen  | 20w140d | CLB19    | + |  |   |   |   |   | 1 | NR    |
| C27                                                     | Baoding/2019/hen  | 02w12d  | CLB110   | + |  |   |   |   |   | 1 | DP    |
| C28                                                     | Baoding/2020/hen  | 04w22d  | CLB101   | + |  | + |   |   |   | 2 | DP    |
| C29                                                     | Baoding/2020/hen  | 06w37d  | CLB137   |   |  | + |   |   |   | 1 | RP    |
| C30                                                     | Baoding/2020/hen  | 04w25d  | CLB80    | + |  | + |   | + |   | 3 | DP    |
| C31                                                     | Baoding/2020/hen  | 04w25d  | CLB81    | + |  |   |   |   |   | 1 | DP    |
| C32                                                     | Baoding/2019/hen  | 05w35d  | CLB31    | + |  | + |   |   |   | 2 | NR    |
| C33                                                     | Cangzhou/?/hen    | 18w120d | CLB67    |   |  |   |   |   | + | 1 | St    |
| C34                                                     | Cangzhou/2019/hen | 08w50d  | C2       |   |  | + |   |   |   | 1 | St    |
| C35                                                     | Cangzhou/2019/hen | 20w140d | CLB43    | + |  |   |   |   |   | 1 | NR    |
| C36                                                     | Cangzhou/2020/hen | 08w50d  | CLB97    | + |  |   |   |   |   | 1 | St    |
| C37                                                     | Cangzhou/2020/hen | 29w197d | CLB74    |   |  |   |   |   | + | 1 | DP    |
| C38                                                     | Cangzhou/?/hen    | 18w120d | CLB72    | + |  |   |   |   |   | 1 | DP    |
| C39                                                     | Cangzhou/?/hen    | 20w140d | CLB73    | + |  |   |   |   |   | 1 | NR    |

|     |                       |         |         |   |   |   |   |   |       |
|-----|-----------------------|---------|---------|---|---|---|---|---|-------|
| C40 | Cangzhou/2020/hen     | 28w190d | CLB20   | + |   |   |   | 1 | DP    |
| C41 | Cangzhou/2019/hen     | 05w35d  | CLB69   |   | + | + |   | 2 | DP    |
| C42 | Cangzhou/2019/hen     | 05w30d  | CLB26   | + | + | + |   | 3 | DP    |
| C43 | Cangzhou/2020/hen     | 29w200d | CLB92   |   |   |   | + | 1 | DP    |
| C44 | Cangzhou/2020/hen     | 18w120d | CLB5    | + |   |   |   | 1 | DP    |
| C45 | Cangzhou/2020/hen     | 20w138d | CLB1    |   | + | + |   | 2 | DP    |
| C46 | Cangzhou/2019/hen     | 29w200d | CLB106  |   | + |   |   | 1 | RP    |
| C47 | Cangzhou/2019/hen     | 09w80d  | CLB65   | + |   |   |   | 1 | DP    |
| C48 | Cangzhou/2019/hen     | 16w110d | CLB16   | + |   |   |   | 1 | DP    |
| C49 | Cangzhou/2020/hen     | 05w35d  | CLB124  | + |   |   |   | 1 | DP    |
| C50 | Cangzhou/2020/hen     | 10w70d  | CLB117  |   | + | + |   | 2 | DP    |
| C51 | Cangzhou/2020/hen     | 09w75d  | CLB53   | + |   |   |   | 1 | DP    |
| C52 | Cangzhou/2020/hen     | 16w108d | CLB112  | + |   |   |   | 1 | DP    |
| C53 | Cangzhou/2020/hen     | 10w64d  | CLB93-2 |   | + |   |   | 1 | DP St |
| C54 | Cangzhou/2019/hen     | 06w39d  | CLB50   |   |   | + |   | 1 | DP    |
| C55 | Cangzhou/2020/hen     | 05w35d  | CLB125  |   | + |   |   | 1 | DP    |
| C56 | Cangzhou/2020/hen     | 19w140d | CLB14   | + |   |   |   | 1 | DP    |
| C57 | Cangzhou/2020/hen     | 05w35d  | CLB127  |   | + |   |   | 1 | DP    |
| C58 | Cangzhou/2020/hen     | 05w35d  | CLB128  |   | + |   |   | 1 | DP    |
| C59 | Cangzhou/2020/hen     | 13w85d  | CLB109  | + |   | + |   | 2 | DP    |
| C60 | Hengshui/2019/hen     | 08w70d  | CLB105  | + |   |   |   | 1 | DP    |
| C61 | Hengshui/2020/hen     | 22w150d | CLB7    | + |   |   |   | 1 | NR    |
| C62 | Hengshui/2020/hen     | 35w240d | CLB104  | + |   |   |   | 1 | RP    |
| C63 | Hengshui/2019/hen     | 19w130d | CLB58   |   | + |   |   | 1 | DP    |
| C64 | Hengshui/2020/hen     | 26w180d | CLB75   | + |   |   |   | 1 | DP    |
| C65 | Hengshui/2020/hen     | 09w60d  | CLB60   | + |   |   |   | 1 | NR    |
| C66 | Langfang/2020/hen     | 14w95d  | CLB41   | + |   | + |   | 2 | DP    |
| C67 | Shijiazhuang/2019/hen | 08w50d  | CLB95   | + |   |   |   | 1 | St    |
| C68 | Shijiazhuang/2020/hen | 19w130d | CLB84   | + |   | + |   | 2 | DP    |
| C69 | Shijiazhuang/2019/hen | 05w30d  | CLB47   | + |   |   |   | 1 | St    |
| C70 | Shijiazhuang/2020/hen | 26w180d | CLB133  | + | + |   |   | 2 | NR    |
| C71 | Shijiazhuang/2020/hen | 03w18d  | CLB61   | + |   |   |   | 1 | DP    |
| C72 | Shijiazhuang/2019/hen | 09w60d  | CLB42   | + |   |   |   | 1 | DP    |
| C73 | Shijiazhuang/2019/hen | 23w160d | CLB68   | + |   |   |   | 1 | DP    |
| C74 | Xingtai/2020/hen      | 18w120d | CLB2    | + |   |   |   | 1 | St    |
| C75 | Baoding/2019/hen      | 02w10d  | CLB54   |   |   |   |   | 0 |       |
| C76 | Baoding/2019/hen      | 02w13d  | CLB49   |   |   |   |   | 0 |       |
| C77 | Cangzhou/2019/hen     | 05w35d  | C4      |   |   |   |   | 0 |       |
| C78 | Cangzhou/2020/hen     | 06w37d  | CLB132  |   |   |   |   | 0 |       |
| C79 | Hengshui/2020/hen     | 07w45d  | CLB48   |   |   |   |   | 0 |       |
| C80 | Shijiazhuang/2020/hen | 07w46d  | CLB12   |   |   |   |   | 0 |       |

|      |                       |         |          |   |
|------|-----------------------|---------|----------|---|
| C81  | Baoding/2019/hen      | 08w50d  | CLB79    | 0 |
| C82  | Baoding/2019/hen      | 09w60d  | CLB108   | 0 |
| C83  | Baoding/2019/hen      | 09w60d  | CLB108-1 | 0 |
| C84  | Baoding/2019/hen      | 09w60d  | CLB30    | 0 |
| C85  | Baoding/2019/hen      | 09w60d  | CLB87    | 0 |
| C86  | Cangzhou/2020/hen     | 10w64d  | CLB93    | 0 |
| C87  | Cangzhou/2020/hen     | 10w64d  | CLB93-1  | 0 |
| C88  | Cangzhou/2020/hen     | 10w64d  | CLB93-3  | 0 |
| C89  | Cangzhou/2020/hen     | 10w64d  | CLB93-4  | 0 |
| C90  | Cangzhou/2020/hen     | 10w64d  | CLB93-5  | 0 |
| C91  | Hengshui/2020/hen     | 10w65d  | CLB10    | 0 |
| C92  | Cangzhou/2019/hen     | 10w70d  | CLB89    | 0 |
| C93  | Baoding/2019/hen      | 10w70d  | C1       | 0 |
| C94  | Baoding/2019/hen      | 12w80d  | CLB38    | 0 |
| C95  | Baoding/2020/hen      | 18w120d | CLB3     | 0 |
| C96  | Shijiazhuang/2020/hen | 18w120d | CLB102   | 0 |
| C97  | Cangzhou/2020/hen     | 18w120d | CLB107   | 0 |
| C98  | Cangzhou/2020/hen     | 18w120d | CLB130   | 0 |
| C99  | Shijiazhuang/2020/hen | 18w120d | CLB55    | 0 |
| C100 | Baoding/2020/hen      | 19w130d | CLB63    | 0 |
| C101 | Baoding/2020/hen      | 19w130d | CLB115   | 0 |
| C102 | Baoding/2020/hen      | 19w130d | CLB116   | 0 |
| C103 | Baoding/2020/hen      | 19w130d | CLB135   | 0 |
| C104 | Baoding/2019/hen      | 22w150d | CLB9     | 0 |
| C105 | Shijiazhuang/2020/hen | 22w150d | CLB21    | 0 |
| C106 | Cangzhou/2019/hen     | 23w160d | CLB44    | 0 |
| C107 | Cangzhou/2020/hen     | 23w160d | CLB4     | 0 |
| C108 | Hengshui/2019/hen     | 25w170d | C5       | 0 |
| C109 | Baoding/2019/hen      | 25w170d | CLB39    | 0 |
| C110 | Baoding/2019/hen      | 25w170d | CLB40    | 0 |
| C111 | Baoding/2020/hen      | 26w180d | CLB45    | 0 |
| C112 | Baoding/2020/hen      | 26w180d | CLB46    | 0 |
| C113 | Cangzhou/2019/hen     | 28w190d | CLB34    | 0 |
| C114 | Baoding/2020/hen      | 28w190d | CLB113   | 0 |
| C115 | Hengshui/2020/hen     | 29w200d | CLB23    | 0 |
| C116 | Cangzhou/2019/hen     | 29w200d | CLB28    | 0 |
| C117 | Hengshui/2019/hen     | 29w200d | CLB35    | 0 |
| C118 | Cangzhou/2019/hen     | 29w200d | CLB66    | 0 |
| C119 | Cangzhou/2020/hen     | 29w200d | CLB76    | 0 |
| C120 | Cangzhou/2020/hen     | 29w200d | CLB85    | 0 |
| C121 | Shijiazhuang/2020/hen | 35w240d | CLB8     | 0 |

|      |                   |         |        |  |  |  |   |  |
|------|-------------------|---------|--------|--|--|--|---|--|
| C122 | Cangzhou/2020/hen | 36w250d | CLB36  |  |  |  | 0 |  |
| C123 | Cangzhou/2020/hen | 42w290d | CLB71  |  |  |  | 0 |  |
| C124 | Baoding/2020/hen  | 49w340d | CLB138 |  |  |  | 0 |  |

#### The information of Pullet/layer hens (2021)

|     |                       |         |      |   |   |   |   |    |
|-----|-----------------------|---------|------|---|---|---|---|----|
| L1  | Baoding/2021/hen      | 06w42d  | Ly05 | + | + |   | 2 | NR |
| L2  | Baoding/2021/hen      | 05w35d  | Ly06 | + | + |   | 2 | NR |
| L3  | Shijiazhuang/2021/hen | 06w38d  | Ly20 |   | + | + | 2 | NR |
| L4  | Cangzhou/2021/hen     | 04w25d  | Ly26 |   | + | + | 2 | NR |
| L5  | Shijiazhuang/2021/hen | 08w50d  | Ly29 |   | + | + | 2 | NR |
| L6  | Baoding/2021/hen      | 19w130d | Ly44 | + |   | + | 2 | NR |
| L7  | Baoding/2021/hen      | 13w87d  | Ly01 | + |   |   | 1 | NR |
| L8  | Cangzhou/2021/hen     | 08w50d  | Ly03 |   |   | + | 1 | NR |
| L9  | Baoding/2021/hen      | 22w150d | Ly04 |   |   | + | 1 | NR |
| L10 | Baoding/2021/hen      | 13w90d  | Ly09 | + |   |   | 1 | NR |
| L11 | Baoding/2021/hen      | 22w150d | Ly11 | + |   |   | 1 | NR |
| L12 | Baoding/2021/hen      | 13w87d  | Ly12 | + |   |   | 1 | NR |
| L13 | Baoding/2021/hen      | 13w90d  | Ly13 |   |   | + | 1 | NR |
| L14 | Cangzhou/2021/hen     | 15w105d | Ly14 |   |   | + | 1 | NR |
| L15 | Langfang/2021/hen     | 17w115d | Ly15 |   |   | + | 1 | NR |
| L16 | Cangzhou/2021/hen     | 23w160d | Ly18 |   |   | + | 1 | NR |
| L17 | Baoding/2021/hen      | 08w52d  | Ly2? |   | + |   | 1 | NR |
| L18 | Baoding/2021/hen      | 06w42d  | Ly22 |   | + |   | 1 | NR |
| L19 | Shijiazhuang/2021/hen | 08w50d  | Ly23 |   | + |   | 1 | NR |
| L20 | Baoding/2021/hen      | 05w35d  | Ly25 | + |   |   | 1 | NR |
| L21 | Baoding/2021/hen      | 09w58d  | Ly27 |   |   | + | 1 | NR |
| L22 | Baoding/2021/hen      | 10w65d  | Ly28 |   |   | + | 1 | NR |
| L23 | Cangzhou/2021/hen     | 06w40d  | Ly30 | + |   |   | 1 | NR |
| L24 | Shijiazhuang/2021/hen | 09w60d  | Ly31 |   | + |   | 1 | NR |
| L25 | Hengshui/2021/hen     | 09w60d  | Ly32 | + |   |   | 1 | NR |
| L26 | Baoding/2021/hen      | 10w64d  | Ly33 | + |   |   | 1 | NR |
| L27 | Hengshui/2021/hen     | 13w90d  | Ly34 | + |   |   | 1 | NR |
| L28 | Cangzhou/2021/hen     | 14w95d  | Ly35 |   |   | + | 1 | NR |
| L29 | Cangzhou/2021/hen     | 05w30d  | Ly36 |   |   | + | 1 | NR |
| L30 | Baoding/2021/hen      | 16w110d | Ly37 | + |   |   | 1 | NR |
| L31 | Cangzhou/2021/hen     | 19w128d | Ly38 | + |   |   | 1 | NR |
| L32 | Cangzhou/2021/hen     | 19w130d | Ly39 | + |   |   | 1 | NR |
| L33 | Cangzhou/2021/hen     | 22w150d | Ly40 | + |   |   | 1 | NR |
| L34 | Baoding/2021/hen      | 20w140d | Ly41 | + |   |   | 1 | NR |
| L35 | Cangzhou/2021/hen     | 20w140d | Ly42 | + |   |   | 1 | NR |
| L36 | Baoding/2021/hen      | 19w130d | Ly45 | + |   |   | 1 | NR |
| L37 | Baoding/2021/hen      | 19w130d | Ly46 | + |   |   | 1 | NR |

|     |                   |         |        |   |   |   |    |
|-----|-------------------|---------|--------|---|---|---|----|
| L38 | Baoding/2021/hen  | 26w160d | Ly47   | + |   | 1 | NR |
| L39 | Cangzhou/2021/hen | 26w160d | Ly48   | + |   | 1 | NR |
| L40 | Cangzhou/2021/hen | 03w20d  | Ly49   |   | + | 1 | NR |
| L41 | Hengshui/2021/hen | 10w70d  | Ly50   |   | + | 1 | NR |
| L42 | Cangzhou/2021/hen | 05w30d  | Ly54   |   | + | 1 | NR |
| L43 | Hengshui/2021/hen | 06w40d  | Ly55   |   | + | 1 | NR |
| L44 | Baoding/2021/hen  | 05w31d  | Ly56   |   | + | 1 | NR |
| L45 | Cangzhou/2021/hen | 08w55d  | Ly57   |   | + | 1 | NR |
| L46 | Cangzhou/2021/hen | 13w90d  | Ly58   | + |   | 1 | NR |
| L47 | Cangzhou/2021/hen | 20w138d | Ly59   | + |   | 1 | NR |
| L48 | Cangzhou/2021/hen | 05w35d  | Ly61   | + |   | 1 | NR |
| L49 | Cangzhou/2021/hen | 05w32d  | Ly62   | + |   | 1 | NR |
| L50 | Baoding/2021/hen  | 09w57d  | Ly63   | + |   | 1 | NR |
| L51 | Cangzhou/2021/hen | 14w92d  | Ly02   |   |   | 0 | NR |
| L52 | Cangzhou/2021/hen | 05w31d  | Ly43   |   |   | 0 | NR |
| L53 | Baoding/2021/hen  | 16w110d | Ly29   |   |   | 0 | NR |
| L54 | Cangzhou/2021/hen | 19w128d | Ly38   |   |   | 0 | NR |
| L55 | Cangzhou/2021/hen | 19w130d | Ly16   |   |   | 0 | NR |
| L56 | Cangzhou/2021/hen | 22w150d | Ly70   |   |   | 0 | NR |
| L57 | Baoding/2021/hen  | 20w140d | Ly16-1 |   |   | 0 | NR |
| L58 | Cangzhou/2021/hen | 20w140d | Ly71   |   |   | 0 | NR |
| L59 | Baoding/2021/hen  | 19w130d | Ly65   |   |   | 0 | NR |
| L60 | Baoding/2021/hen  | 19w130d | Ly66   |   |   | 0 | NR |
| L61 | Baoding/2021/hen  | 26w160d | Ly43   |   |   | 0 | NR |

Abbreviations: ANV, avian nephritis virus; CAsV, chicken astrovirus; ARe, avian reovirus; ARoV, avian rotavirus; IBV, infectious bronchitis virus; FAdV-I, fowl adenovirus of group-I; ChPV, chicken parvovirus. RP, Respiratory problems; DP, Digestive problems; St, Stunting; NR, Not reported.

**Supplementary Table S2.** Parvovirus (PV) reference strain information.

| Strain       | Country | Organism           | Host          | GenBank     |
|--------------|---------|--------------------|---------------|-------------|
| GX-CH-PV-15  | CN/2015 | Chicken parvovirus | chicken       | KX133422.1  |
| GX-CH-PV-10  | CN/2015 | Chicken parvovirus | chicken       | KX133417.1  |
| GX-CH-PV-11  | CN/2015 | Chicken parvovirus | chicken       | KX133418.1  |
| GX-CH-PV-8   | CN/2015 | Chicken parvovirus | chicken       | KX133415.1  |
| GX-CH-PV-5   | CN/2014 | Chicken parvovirus | chicken       | KX133426.1  |
| CH-CH-PV-4   | CN/2014 | Chicken parvovirus | chicken       | KX084401.1  |
| CH-CH-PV-2   | CN/2014 | Chicken parvovirus | chicken       | KX084400.1  |
| GA/1478/2003 | US/2003 | Chicken parvovirus | chicken       | MN782010.1  |
| GA/1477/2005 | US/2005 | Chicken parvovirus | chicken       | MN782009.1  |
| GA/1472/2004 | US/2004 | Chicken parvovirus | chicken       | MN782008.1  |
| ABU-P1       | HU/2009 | Chicken parvovirus | Chicken       | NC_024452.1 |
| GX-CH-PV-27  | CN/2017 | Chicken parvovirus | Gallus gallus | MG602517.1  |
| GX-CH-PV-24  | CN/2017 | Chicken parvovirus | Gallus gallus | MG602514.1  |
| GX-CH-PV-23  | CN/2016 | Chicken parvovirus | Gallus gallus | MG602513.1  |

|             |         |                    |                     |             |
|-------------|---------|--------------------|---------------------|-------------|
| GX-CH-PV-22 | CN/2016 | Chicken parvovirus | Gallus gallus       | MG602512.1  |
| ADL120035   | KR/2012 | Chicken parvovirus | Gallus gallus       | KJ486490.1  |
| ADL120686   | KR/2012 | Chicken parvovirus | Gallus gallus       | KJ486491.1  |
| ADL120019   | KR/2012 | Chicken parvovirus | Gallus gallus       | KJ486489.1  |
| IPV         | BR/2012 | Chicken parvovirus | Gallus gallus       | KU569162.1  |
| TuPV JO11   | US/2014 | Turkey parvovirus  | Meleagris gallopavo | KM598421.1  |
| TuPV 1090   | US/2014 | Turkey parvovirus  | Meleagris gallopavo | KM598420.1  |
| TuPV 1030   | US/2014 | Turkey parvovirus  | Meleagris gallopavo | KM598418.1  |
| GX-Tu-PV-3  | CN/2015 | Turkey parvovirus  | Turkey              | KX084398.1  |
| GX-Tu-PV-2  | CN/2014 | Turkey parvovirus  | Turkey              | KX084397.1  |
| GX-Tu-PV-1  | CN/2015 | Turkey parvovirus  | Turkey              | KX084396.1  |
| 1078        | US/2009 | Turkey parvovirus  | Turkey              | NC_024454.1 |
| 260         | US/2009 | Turkey parvovirus  | Turkey              | NC_038534.1 |
| DS15        | CN/2015 | Duck parvovirus    | cherry valley duck  | KX384726.1  |

Abbreviations: CN, China; UK, United Kingdom; IN, India; US, United States; PL, Poland; SF, South Africa; NL, Netherlands; JP, Japan; AUS, Australia; BR, Brazil.

**Supplementary Table S3.** Avian nephritis virus (ANV) and chicken astrovirus (CAstV) reference strain information.

| Viruses | Strain                          | Country  | Organism | Host          | GenBank    |
|---------|---------------------------------|----------|----------|---------------|------------|
| ANV     | -                               | JP/2000  | ANV-2    | Chicken       | AB046864.1 |
| ANV     | ANV-VF08-60                     | UK/2008  | ANV-2    | Chicken       | HQ330505.1 |
| ANV     | VF16-03-164b                    | UK/2016  | ANV-3    | Chicken       | MT585644.1 |
| ANV     | Avian AstV Brazil 57-3          | BR/2014  | ANV-4    | Chicken       | KU711072.1 |
| ANV     | ANV-VF07-13/7                   | UK/2007  | ANV-4    | Chicken       | HQ330482.1 |
| ANV     | ANV/CHN/BJCP510-2/2018          | CN/2018  | ANV-5    | Gallus gallus | MN732558.1 |
| ANV     | Avian AstV Brazil 48-5          | BR/2014  | ANV-6    | Chicken       | KU711068.1 |
| ANV     | Avian AstV Brazil 48-9          | BR/2014  | ANV-6    | Chicken       | KU711069.1 |
| ANV     | NSW-3a                          | AUS/2009 | ANV-7    | Chicken       | KM985692.1 |
| CAstV   | P22-18.8.00                     | NL/2004  | Ai       | Gallus gallus | JN582318.1 |
| CAstV   | 612                             | SF/1994  | Ai       | Gallus gallus | JN582317.1 |
| CAstV   | VF08-56                         | UK/2008  | Ai       | Gallus gallus | JN582319.1 |
| CAstV   | CAstV/Poland/G059/2014          | PL/2014  | Aiii     | Gallus gallus | KT886453.1 |
| CAstV   | 1010                            | UK/2004  | Bi       | Gallus gallus | JN582306.1 |
| CAstV   | AAstV/Chicken/CHN/2018/CZ1801   | CN/2018  | Bi       | Gallus gallus | MN807051.1 |
| CAstV   | CAstV/CHN/GDYHTJ718-6/2018      | CN/2018  | Bi       | Chicken       | MN725026.1 |
| CAstV   | 4175                            | US/2006  | Bii      | Gallus gallus | JF832365.1 |
| CAstV   | CAstV/INDIA/ANAND/2016          | IN/2016  | Biii     | Chicken       | KY038163.1 |
| CAstV   | PDRC/200/East Zone              | IN /2011 | Biii     | Gallus gallus | JX945853.1 |
| CAstV   | CAstV/CA-AB/Chicken/17-0773b/17 | CA/2017  | Biv      | Chicken       | MT789783.1 |
| CAstV   | CAstV/CA-SK/Chicken/19-0935/19  | CA/2019  | Biv      | Chicken       | MT789786.1 |
| CAstV   | CkP5                            | US/2016  | Biv      | Chicken       | KX397576.1 |

Abbreviations: JP, Japan; UK, United Kingdom; CN, China; BR, Brazil; AUS, Australia; NL, Netherlands; PL, Poland; SF, South Africa; US, United States; IN, India; CA, Canada.

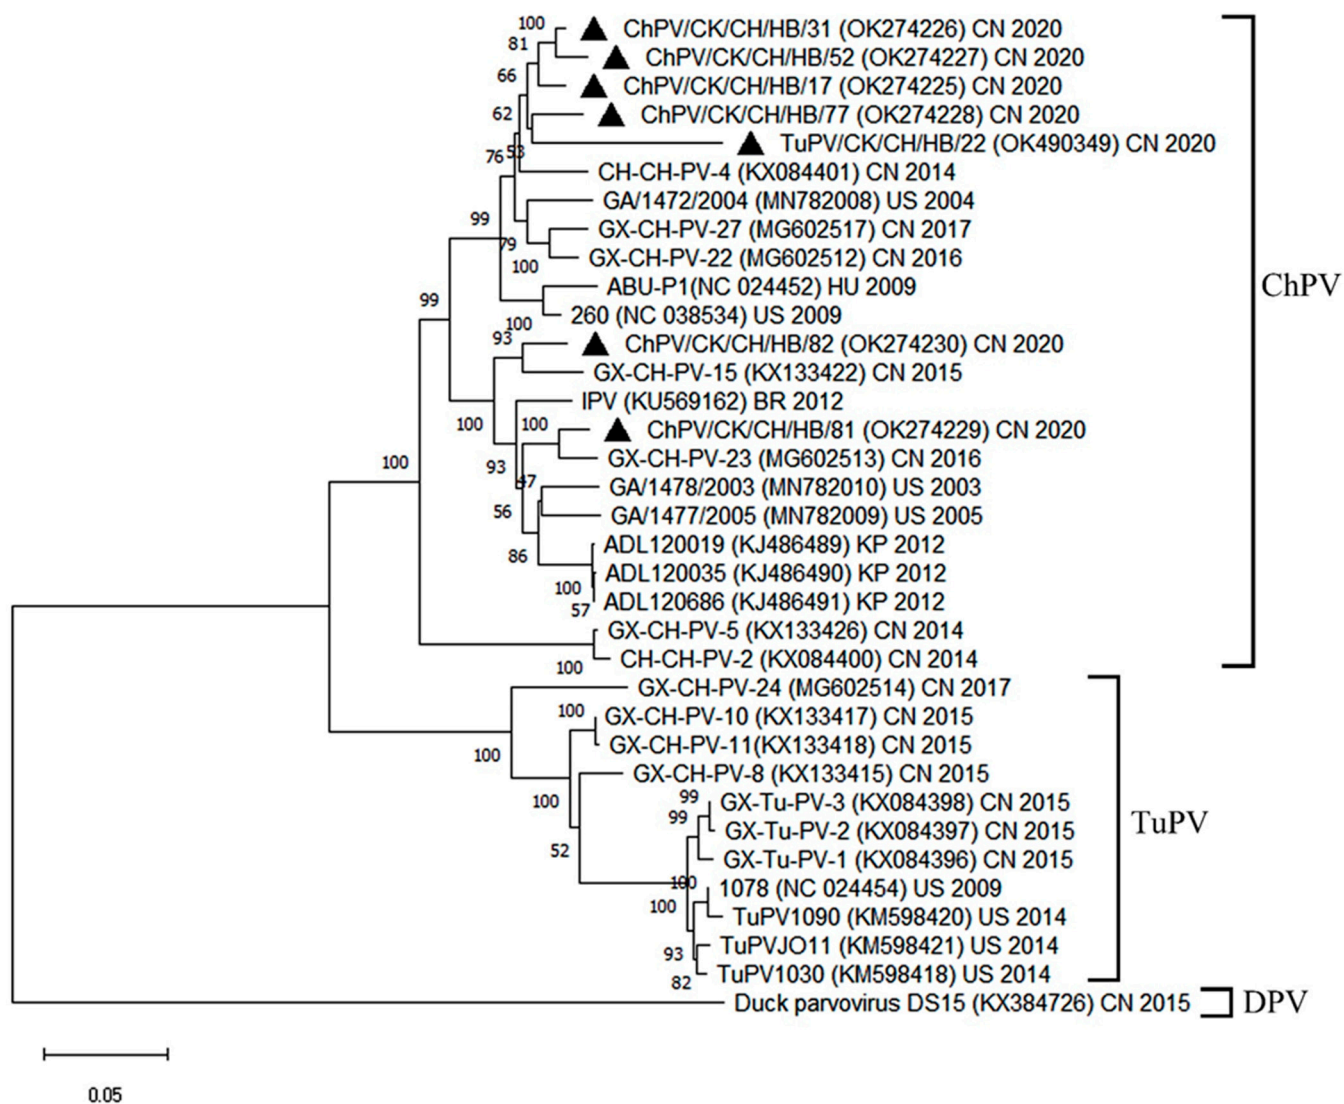

(A)



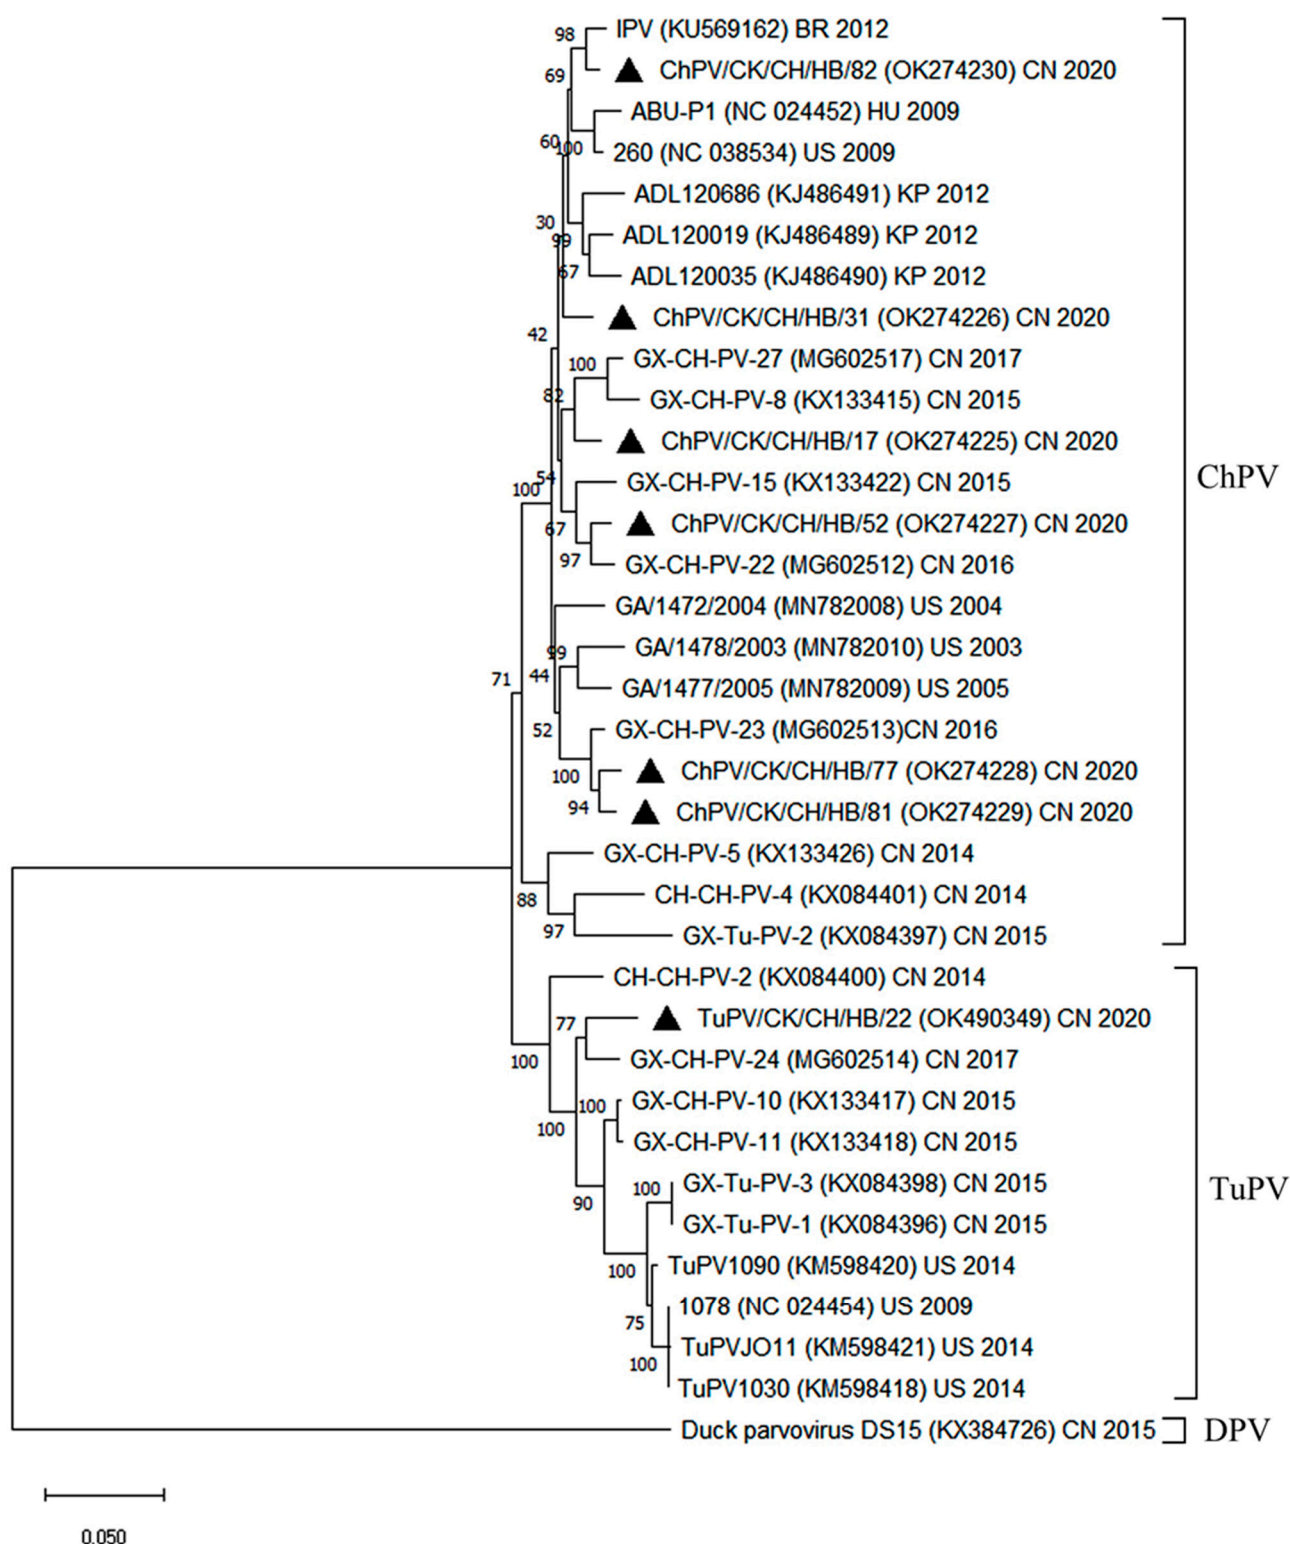

(B)

**Supplementary Figure S1.** Phylogenetic tree based on the full coding sequence of the VP1 (A) and NS (B) genes of parvovirus. Molecular Evolutionary Genetics Analysis version 11 were used for phylogenetic tree reconstruction using the neighbor-joining algorithm with 1000 bootstrap replicates. The tree was drawn to scale, with branch lengths in the same units as those of the evolutionary distances used to infer the phylogenetic tree. Accession numbers are shown in parentheses. Strains with ▲ represent

---

PV sequenced in this paper. Sequence of duck parvovirus was used as the out-group control. CN, China; US, United States; HU, Hungary; BR, Brazil; KR, South Korea.
